1 **Comparison of logistic regression with regularized machine learning methods for the**  
2 **prediction of tuberculosis disease in people living with HIV: cross-sectional**  
3 **hospital-based study in Kisumu County, Kenya.**

4 **James Orwa\*<sup>1</sup>, Patience Oduor<sup>3</sup>, Douglas Okelloh<sup>2</sup>, Dickson Gethi<sup>2</sup>, Janet Agaya<sup>2</sup>**  
5 **, Albert Okumu<sup>2</sup>, Steve Wandiga<sup>2</sup>.**

6 **Author affiliations:**

7 <sup>1</sup>Department of Population Health, Aga Khan University, Kenya

8 <sup>2</sup>Center for Global Health Research, Kenya Medical Research Institute

9 <sup>3</sup>Institute of Global Health Equity Research, University of Global Health Equity, Rwanda

10

11 **\*Corresponding author**

12 James Orwa, Department of Population Health Sciences, Aga Khan University Kenya, P.O. Box 30270  
13 – 00100, Nairobi, Kenya. **Email:** [orwa.ariaro35@gmail.com](mailto:orwa.ariaro35@gmail.com) / [james.orwa@aku.edu](mailto:james.orwa@aku.edu).

14

15

16

17

18

19

20

21

22

23 **Abstract**

24 Background: Tuberculosis (TB) is a major public health concern, particularly among  
25 people living with the Human immunodeficiency Virus (PLWH). Accurate prediction of  
26 TB disease in this population is crucial for early diagnosis and effective treatment.  
27 Logistic regression and regularized machine learning methods have been used to predict  
28 TB, but their comparative performance in HIV patients remains unclear. The study aims  
29 to compare the predictive performance of logistic regression with that of regularized  
30 machine learning methods for TB disease in HIV patients.

31 Methods: Retrospective analysis of data from HIV patients diagnosed with TB in three  
32 hospitals in Kisumu County (JOOTRH, Kisumu sub-county hospital, Lumumba health  
33 center) between [dates]. Logistic regression, Lasso, Ridge, Elastic net regression were  
34 used to develop predictive models for TB disease. Model performance was evaluated  
35 using accuracy, and area under the receiver operating characteristic curve (AUC-ROC).

36 Results: Of the 927 PLWH included in the study, 107 (12.6%) were diagnosed with TB.  
37 Being in WHO disease stage III/IV (aOR: 7.13; 95%CI: 3.86-13.33) and having a cough in  
38 the last 4 weeks (aOR: 2.34;95%CI: 1.43-3.89) were significant associated with the TB.  
39 Logistic regression achieved accuracy of 0.868, and AUC-ROC of 0.744. Elastic net  
40 regression also showed good predictive performance with accuracy, and AUC-ROC  
41 values of 0.874 and 0.762, respectively.

42 Conclusions: Our results suggest that logistic regression, Lasso, Ridge regression, and  
43 Elastic net can all be effective methods for predicting TB disease in HIV patients. These  
44 findings may have important implications for the development of accurate and reliable  
45 models for TB prediction in HIV patients.

46 Keywords: tuberculosis, HIV, logistic regression, Lasso, Ridge regression, prediction,  
47 machine learning, cross-sectional study.

## 48 **Introduction**

49 Tuberculosis (TB) is a significant health burden in many parts of the world, particularly  
50 in people living with Human Immunodeficiency Virus (PLWHIV), who are at increased  
51 risk of developing the disease. In 2021, about 187 000 people died of HIV-associated TB  
52 related conditions, with the 76 percent of notified TB patients tested for HIV test and  
53 knew their result. The percentage of notified TB cases was an increase from 73 percent  
54 reported in 2020(1). To achieve the 2030 global tuberculosis mortality reduction of 90%  
55 and 80% incidence (SDG targets goal 3.3), early and accurate diagnosis of TB disease of  
56 all types including drug sensitive, and drug resistant TB is important(2).

57 Africa bears high burden of TB and HIV co-infection as 10.6 million people infected with  
58 TB in 2021 globally, 23% were in Africa and 6.7% of them were coinfecting with HIV(3).  
59 Kenya is one of the 30 countries in SSA with the high TB burden in the world and the  
60 fifth in Africa(3). The estimated HIV prevalence as reported by Kenya Indicator Aids  
61 Survey of 2012 was 7.1% with the highest burden in Nyanza province of 15.1%(4) . The  
62 Kenya Population-based Impact Assessment (KENPHIA) survey reported a national HIV  
63 prevalence of 4.9% which was lower the prevalence of 2012 survey(5). Kisumu county is  
64 third in Kenya among counties with the highest burden of HIV after Siaya and Homabay  
65 counties(6). HIV is driving the TB epidemic in areas where there is high HIV prevalence  
66 ((7). It is due to this TB/HIV synergy that World Health Organization(WHO)  
67 recommendation that every HIV patient should be screened for TB clinical symptoms of  
68 cough, fever, night sweats and weight loss and vice versa (8).

69 The highest priority for TB control is the identification and treatment of infectious cases  
70 identified by at least sputum smear, culture tests or clinical symptoms among the

71 population at risk. One of the ways to identify infected cases is through intensive case  
72 finding especially in countries with high TB burdens. Intensive case finding primarily  
73 involves detecting TB among symptomatic patients who present to health facilities for  
74 HIV care and treatment services. The treatment of TB among people living with HIV  
75 (PLWH) has a high pill burden, drug toxicity, drug-drug interactions and, tuberculosis  
76 associated immune reconstitution inflammatory syndrome and these remains a challenge  
77 to the treatment especially in resource-limited settings(9).

78 Factors found to be influencing TB among PLWH had been explored in several studies  
79 and includes age of the respondents, baseline CD4 count cells (10), WHO disease stage 3  
80 and 4 (2, 7) and previous history of TB disease(11). The analysis of these factors were  
81 based on traditional logistic regression models and has not benefited from newer  
82 techniques such as machine learning technique(9, 12, 13). Early and accurate prediction  
83 of TB in PLWH using machine learning techniques is crucial for effective treatment and  
84 control of the disease. Logistic regression (LR) is a popular statistical method used for  
85 binary classification tasks such as disease prediction. However, LR assumes linearity and  
86 independence of predictors, which may not be realistic in real-world data. Regularized  
87 machine learning methods such as Lasso , Ridge, and Elastic net regression have been  
88 proposed as alternatives to LR to improve prediction accuracy and handle high-  
89 dimensional data. In this study, we compare the performance of LR with Lasso , Ridge,  
90 and Elastic net regression for the prediction of TB in HIV patients using a cross-sectional  
91 hospital-based dataset. Our results provide insights into the suitability of these methods  
92 for predicting TB in HIV patients, which can aid in the development of effective screening  
93 programs and treatment strategies.

## 94 **Methodology**

### 95 **Study design and setting**

96 This was an observational hospital-based prospective study among PLWH accessing care  
97 and treatment service in three highly enrolling HIV care and treatment centres in Kisumu,  
98 Kenya which were Jaramogi Oginga Odinga Teaching and Referral Hospital, Kisumu County  
99 referral hospital and Lumumba Health Centre between 9<sup>th</sup> January 2014 to 15<sup>th</sup> August  
100 2017. Kisumu County is a county located in western Kenya, with its capital city Kisumu.  
101 It covers an area of approximately 2,085 square kilometres and has a population of over  
102 1.2 million people. It is home to Lake Victoria, the largest freshwater lake in Africa and  
103 the source of the Nile River. The county is known for its rich cultural heritage, with the  
104 Luo people being the largest ethnic group. The main economic activities include fishing,  
105 agriculture, and trade. Kisumu is also a hub for transportation and communication in the  
106 region, with a modern airport, port, and railway station.

107 Kisumu County in Kenya has a high burden of HIV and Tuberculosis (TB) infections.  
108 According to the Kenya AIDS Response Progress Report 2021, the county had an HIV  
109 prevalence rate of 13.9%, which is higher than the national average. The report also  
110 indicated that approximately 62% of people living with HIV in Kisumu County are on  
111 antiretroviral therapy (ART) to manage the infection(14).

112 Regarding TB, Kisumu County is ranked among the high TB burden counties in Kenya.  
113 According to the National TB prevalence survey of 2016, Kisumu had a TB prevalence  
114 rate of 390 per 100,000 people, which is higher than the national average(15). The County  
115 Government of Kisumu, together with development partners and stakeholders, is  
116 implementing several strategies to control and manage the spread of both HIV and TB,  
117 including scaling up testing, treatment, and prevention services. The selection of the sites  
118 were informed by a collaborative meeting between Kenya Medical Research Institute  
119 (KEMRI)-Center for Global Health Research (CGHR)-TB branch and Ministry of Health.  
120 Participants who were on TB treatment at the time of the initial presentation to the clinic,

121 being treated for TB diseases or infection within the one year preceding their initial  
122 presentation or without HIV positive documented result were excluded from the study.

### 123 **Variables**

124 The primary outcome was TB diagnosed measured on a binary scale (positive, negative)  
125 based on any of the tests. A positive TB case was defined as active TB bacteriologically  
126 confirmed by smear microscopy, culture or Xpert tests. Demographic and clinical  
127 variables used as predictors included: Age in years, gender, smoking status, use of illegal  
128 drugs, alcohol consumption, ART initiation, baseline CD4 counts, WHO disease staging,  
129 baseline symptoms in the last four weeks (cough, fever, night sweats, and weight loss).

### 130 **Data collection tools and procedure**

131 Eligible patients were informed about the study during their clinic days and invited to  
132 participate. Data on demographic were collected during the enrollment visit. Enrolled  
133 participants were clinically evaluated three times during the study (enrollment, 2-3 days  
134 later, third follow-up visit). The second visit was to determine and report the results of  
135 latent tuberculosis infection testing, whereas the third visit was for repeat clinical  
136 evaluation of the symptoms. The TB disease symptoms were screened using the WHO-  
137 recommended clinical screening tool which consists of questions on current cough, fever,  
138 night sweats, and weight loss at any time of the scheduled study visit.

### 139 **Specimen collection procedure**

140 Regardless of the symptoms, each patient was asked to produce at least one sputum  
141 specimen at the time of initial visit (a spot specimen). This was tested using smear  
142 microscopy to diagnose TB. Participants whose initial smear microscopy were negative  
143 were requested to bring at least one additional specimen for testing, either a morning  
144 specimen (if they remember to bring it with them), or a second spot specimen (if they  
145 forgot to produce and bring the morning specimen) during the second visit. During the

146 follow-up visit, two additional sputa were collected, one of which was the morning  
147 specimen or two spot produced at the time of the visit within one hour interval.

148 Initial samples collected were stored in a refrigerator or cooler box until they were  
149 transported to the central mycobacteriology testing TB laboratory at KEMRI CGHR in Kisian  
150 for processing and culture. Culture was performed in liquid media, using the Bactec  
151 Mycobacterial Growth Indicator Tube (MGIT) 960 system. Sputum specimen collected at  
152 later visits were sent directly to the central laboratory for smear microscopy and culture  
153 and testing with the GeneXpert MTB/RIF assay. The third visit specimen was tested by  
154 culture and Xpert MTB/RIF test using Cepheid's GeneXpert platform. The Xpert MTB/RIF  
155 assay was used as an add-on diagnostic to detect rifampin-resistant strains.

156 Sputum culture was used as the gold standard for TB diagnosis. Any patients whose  
157 sputum smear shows acid fast bacilli (AFB) on microscopy, or whose sputum culture  
158 grows *M. TB*, were notified immediately to return to clinic as soon as possible for a follow-  
159 up clinical evaluation and to initiate TB treatment therapy as per the Kenyan Government  
160 Ministry of Health guidelines(16). On the other hand, all patients with negative culture  
161 results were considered for isoniazid preventive therapy as part of their routine HIV care.

## 162 **Data processing and analysis**

163 Prior to model development, data were explored descriptive using frequency and  
164 percentage for categorical variables and median (interquartile range (IQR)). All variables  
165 were considered clinically important in explaining HIV infection and were included in  
166 the multivariable logistic regression modelling to assess independence and strength of  
167 association in terms of odds ratios.

168 We trained our dataset on a logistic, ridge, LASSO, and elastic net regressions to find  
169 which classifier maximized the accuracy of our TB disease prediction and to ensure they  
170 were robust across various feature selection methods. Due to the size of the dataset, there

171 was no split of the data and all dataset were used as training dataset. Ten-fold cross  
172 validation with five repeats was used to develop the prediction models and to avoid  
173 model overfit. The tuning parameter grids used for ridge and lasso was set as  $10^{\text{seq}(2,$   
174  $-3, \text{by} = -.1)$  and elastic net set with a tuning length of ten. Age in years and CD4 results  
175 were normalized and missing CD4 results were imputed with the median values. The  
176 area under curve (AUC) and accuracy were used to compare the models generated by  
177 different methods. The relative importance of predictors was plotted using variable  
178 importance plot. The aim of the predictive modelling was not to test whether some  
179 variables affect another or to study causal relationships, instead the goal is to make good  
180 predictions for the TB disease. Each classifier is described below. The models were  
181 implemented in RStudio with the *caret* and *glmnet* R package.

## 182 **Logistic regression**

183 Logistic regression (LR) is used principally for predicting binary or multi-class dependent  
184 variables given a set of predictors. This algorithm's response variable is binary, and it  
185 builds a model to predict the odds of its occurrence. The limiting assumptions of  
186 normality and independence of this method have contributed to an increase in the  
187 application and popularity of machine learning techniques to real-world prediction  
188 problems. The logistic function is defined as

$$189 \quad p(X) = \frac{e^{\beta_0 + \beta_1 X_1 + \dots + \beta_p X_p}}{1 + e^{\beta_0 + \beta_1 X_1 + \dots + \beta_p X_p}}$$

190 Where  $\beta_i$  parameters represent the parameter coefficients,  $X_i$  are the explanatory  
191 variables and  $p(X)$  is the probability of having TB disease.

## 192 **Ridge regression**

193 This is a method of shrinkage that constrains the effect of irrelevant estimates to shrink  
194 to zero. The objective function is like logistic regression, however there is a penalty term



195 added that controls the estimated coefficients by adding  $\lambda \sum_{j=1}^p \beta_j^2$  to the objective  
196 function. The  $\lambda$  is the tuning parameter. The ridge for the logistic regression minimizes  
197 the function(17).

$$198 \quad \min \left\{ -\frac{1}{N} \vartheta \mathcal{L}(\beta_0, \beta; y, X) + \lambda |\beta_1^2| \right\}$$

199 Where

200 N=sample size

201  $\beta_0$  = intercept

202  $\beta$ =vector of logistic regression coefficients

203 Y=vector (length N) of outcomes

204 X=matrix of independent variables

205  $\lambda$ =penalty parameter

### 206 **LASSO regression**

207 LASSO is a means of feature selection to shrink the coefficients of “less predictive”  
208 covariates to zero. The least absolute shrinkage and selection operator (lasso) penalty is  
209 an alternative to the ridge that requires a small modification in the penalty. The penalty  
210 is defined as  $\lambda \sum_{j=1}^p |\beta_j|$ . whereas the ridge penalty pushes variables to approximately but  
211 not equal to zero, the lasso penalty will push coefficients all the way to zero. Switching  
212 to the lasso penalty not only improves the model but it also conducts automated feature  
213 selection. The lasso penalty minimizes the following negative log-likelihood function(17).

$$214 \quad \min \left\{ -\frac{1}{N} \vartheta \mathcal{L}(\beta_0, \beta; y, X) + \lambda \|\beta_1\| \right\}$$

215 Where

216 N=sample size

217  $\beta_0 =$  intercept

218  $\beta$ =vector of logistic regression coefficients

219 Y=vector (length N) of outcomes

220 X=matrix of independent variables

221  $\lambda$ =penalty parameter

## 222 **Elastic net regression**

223 This is a generalization of the ridge and lasso penalties that combines the two penalties.

224 The advantage of elastic net penalty is that it enables effective regularization via the ridge

225 penalty with the feature selection characteristics of the lasso penalty. Both methods

226 reduce the variance hence improves the fit of the model. The elastic net estimator for

227 logistic regression minimizes(17).

$$228 \quad \min \left\{ -\frac{1}{N} \vartheta \mathcal{L}(\beta_0, \beta; y, X) + \lambda(\alpha \|\beta_1\| + (1 - \alpha) \|\beta_1^2\|) \right\}$$

229 Where

230 N=sample size

231  $\beta_0 =$  intercept

232  $\beta$ =vector of logistic regression coefficients

233 Y=vector (length N) of outcomes

234 X=matrix of independent variables

235  $\lambda$ =penalty parameter

236

## 237 Ethical consideration

238 The study was approved by Kenya Medical Research Institute Scientific and Ethical  
239 Review Unit with approval reference number SSC#2670. Other ethical approvals were  
240 obtained from the respective hospitals and from the County Ministry of Health after  
241 being briefed about the purpose and benefits of the study. All patients provided written  
242 signed consent before the start of the data collection. Patients who were under the age of  
243 18 were asked to sign an assent form, and their legal guardian signed a consent form on  
244 their behalf. The study was conducted in accordance with the ethical standards of the  
245 KEMRI institutional scientific research committee.

## 246 Results

### 247 Baseline characteristics

248 A total of 927 participants were screened, out of whom 893 were eligible, 849 participants  
249 consented to participate in the study and were enrolled. The median age was 32 (IQR: 26-  
250 39) years. Majority of participants were females (60.8%, n=516), 25 (2.9%) were smokers,  
251 10 (1.2%) were users of illegal drugs, and 53 (6.2%) were consuming alcohol. Slightly half  
252 (50.8%; n=431) of the participants were on ART, the median CD4 cell counts were 308  
253 (IQR: 155.5-507.0), and 730 (86.0%) had been started on cotrimoxazole preventive therapy.  
254 The number in each WHO disease stage decreased as the stage advances with only 79  
255 (9.3%) of the participants in WHO disease stage IV. TB disease was diagnosed in 107  
256 (12.6%; 95%CI:10.4%-14.8%) of the patients (Table 1).

257 *Table 1: Baseline demographic and clinical characteristics of the participants, N=849*

| <b>Variable</b>                        | <b>N = 849<sup>1</sup></b> |
|----------------------------------------|----------------------------|
| <b>Age in years, Median (IQR)</b>      | 32.0 (26.0 – 39.0)         |
| <b>Gender, n (%)</b>                   |                            |
| Males                                  | 333 (39.2)                 |
| Females                                | 516 (60.8)                 |
| <b>Smoking, n (%)</b>                  | 25 (2.9)                   |
| <b>Use of any illegal Drugs, n (%)</b> | 10 (1.2)                   |

| Variable                         | N = 849 <sup>1</sup>  |
|----------------------------------|-----------------------|
| Consume alcohol, n (%)           | 53 (6.2)              |
| Started on ART, n (%)            | 431 (50.8)            |
| Baseline CD4 count, Median (IQR) | 308.0 (155.5 – 507.0) |
| Started on CPT, n (%)            | 730 (86.0)            |
| WHO stage, n (%)                 |                       |
| WHO stage 1                      | 430 (50.6)            |
| WHO stage 2                      | 340 (40.0)            |
| WHO stage 3/4                    | 79 (9.3)              |
| TB status                        |                       |
| Negative                         | 742 (87.4)            |
| Positive                         | 107 (12.6)            |

258

### 259 Presenting symptoms at baseline and follow-up

260 There was a reduction in the number of symptoms during the follow-up period  
 261 compared to those presented at baseline. Weight loss was reported by most of the  
 262 participant baseline, whereas cough in the last four weeks was the most common  
 263 symptoms at the time of follow-up. There were 141 (15.6%) who reported all the  
 264 symptoms at baseline, this reduced to only 30 (3.6%) of the patients at follow-up (Table  
 265 2).

266 *Table 2: Presenting symptoms at enrollment and follow-up visits*

| Symptoms in the last 4 weeks | Visit type          |                    |
|------------------------------|---------------------|--------------------|
|                              | Enrollment, N = 849 | Follow-up, N = 836 |
| Cough, n (%)                 | 412 (48.5)          | 210 (25.1)         |
| Fevers, n (%)                | 408 (48.1)          | 178 (21.3)         |
| Night sweats, n (%)          | 323 (38.0)          | 148 (17.7)         |
| Weight loss, n (%)           | 454 (53.5)          | 176 (21.1)         |
| All symptoms, n (%)          | 141 (16.6)          | 30 (3.6)           |

267

### 268 Determinants of TB disease

269 Only WHO disease stage III/IV and cough in the last four weeks during baseline were  
 270 significantly associated with the TB disease in PLWH in the multivariable analysis. The  
 271 odds of getting TB disease among those who had advanced HIV disease stage was seven

272 time higher than the participants in WHO disease stage I (aOR=7.13; 95%CI:3.86-13.33).  
 273 Individuals who reported a cough in the past four weeks were found to have more than  
 274 double the odds of developing tuberculosis compared to those without a recent cough  
 275 (aOR:2.34; 95%CI:1.43-3.89) (Table 3).

276 *Table 3: Factors Associated with the Likelihood of TB Diagnosis in PLWH: Results from a*  
 277 *Logistic Regression Analysis*

| Variables                 | TB diagnosis     |                  | Univariate        |         | Multivariable     |         |
|---------------------------|------------------|------------------|-------------------|---------|-------------------|---------|
|                           | Negative         | Positive         | OR (95%CI)        | P-value | aOR (95%CI)       | P-value |
| Age, median (IQR)         | 31.0 (26.0-39.0) | 35.0 (29.0-39.0) | 1.01 (0.99-1.03)  | 0.233   | 1.00 (0.98-1.03)  | 0.697   |
| Gender                    |                  |                  |                   |         |                   |         |
| Males                     | 280 (84.1)       | 53 (15.9)        |                   |         |                   |         |
| Females                   | 462 (89.5)       | 54 (10.5)        | 0.62 (0.41-0.93)  | 0.02    | 0.76 (0.47-1.21)  | 0.238   |
| Currently smoking         |                  |                  |                   |         |                   |         |
| No                        | 720 (87.4)       | 104 (12.6)       |                   |         |                   |         |
| Yes                       | 22 (88.0)        | 3 (12.0)         | 0.94 (0.22-2.79)  | 0.972   | 0.81 (0.17-2.85)  | 0.763   |
| Use illegal drugs         |                  |                  |                   |         |                   |         |
| No                        | 733 (87.4)       | 106 (12.6)       |                   |         |                   |         |
| Yes                       | 9 (90.0)         | 1 (10.0)         | 0.77 (0.04-4.15)  | 0.804   | 0.75 (0.04-5.39)  | 0.802   |
| Consume Alcohol           |                  |                  |                   |         |                   |         |
| No                        | 697 (87.6)       | 99 (12.4)        |                   |         |                   |         |
| Yes                       | 45 (84.9)        | 8 (15.1)         | 1.25 (0.53-2.60)  | 0.573   | 1.50 (0.59-3.38)  | 0.359   |
| ART                       |                  |                  |                   |         |                   |         |
| No                        | 359 (85.9)       | 59 (14.1)        |                   |         |                   |         |
| Yes                       | 383 (88.9)       | 48 (11.1)        | 0.76 (0.51-1.14)  | 0.192   | 0.80 (0.49-1.31)  | 0.374   |
| CPT                       |                  |                  |                   |         |                   |         |
| No                        | 98 (82.4)        | 21 (17.6)        |                   |         |                   |         |
| Yes                       | 644 (88.2)       | 86 (11.8)        | 0.62 (0.38-1.07)  | 0.076   | 0.59 (0.32-1.10)  | 0.09    |
| WHO stage                 |                  |                  |                   |         |                   |         |
| I                         | 394 (91.6)       | 36 (8.4)         |                   |         |                   |         |
| II                        | 305 (89.7)       | 35 (10.3)        | 1.26 (0.77-2.05)  | 0.361   | 1.14 (0.69-1.90)  | 0.604   |
| III/IV                    | 43 (54.4)        | 36 (45.6)        | 9.16 (5.25-16.12) | < 0.001 | 7.13 (3.86-13.33) | < 0.001 |
| Cough in the last 4 weeks |                  |                  |                   |         |                   |         |
| No                        | 409 (93.6)       | 28 (6.4)         |                   |         |                   |         |
| Yes                       | 333 (80.8)       | 79 (19.2)        | 3.47 (2.23-5.54)  | < 0.001 | 2.34 (1.43-3.89)  | 0.001   |
| Fever last 4 weeks        |                  |                  |                   |         |                   |         |
| No                        | 408 (92.5)       | 33 (7.5)         |                   |         |                   |         |
| Yes                       | 334 (81.9)       | 74 (18.1)        | 2.74 (1.79-4.28)  | < 0.001 | 1.54 (0.91-2.62)  | 0.109   |

|              |            |           |                  |         |                  |  |       |
|--------------|------------|-----------|------------------|---------|------------------|--|-------|
| Night sweets |            |           |                  |         |                  |  |       |
| No           | 473 (89.9) | 53 (10.1) |                  |         |                  |  |       |
| Yes          | 269 (83.3) | 54 (16.7) | 1.79 (1.19-2.70) | 0.005   | 0.71 (0.43-1.18) |  | 0.191 |
| Weight loss  |            |           |                  |         |                  |  |       |
| No           | 369 (93.4) | 26 (6.6)  |                  |         |                  |  |       |
| Yes          | 373 (82.2) | 81 (17.8) | 3.08 (1.96-4.99) | < 0.001 | 1.83 (1.09-3.14) |  | 0.24  |

278  
 279 The first and second vertical dashed lines represent the  $\lambda$  value with the largest AUC and  
 280 the largest  $\lambda$  value within one standard error of the largest AUC that gives the best ROC-  
 281 AUC. In both cases the AUC increase slightly with an increase in the  $\lambda$  and starts to drop  
 282 when the value of AUC is reaches its peak. The maximum value of AUC is reached when  
 283 the value for  $\lambda$  that produces an optimal trade-off between bias and variance is reached.  
 284 Similarly, the number of parameters shrinks with the increasing  $\lambda$  to avoid overfitting of  
 285 the two models.

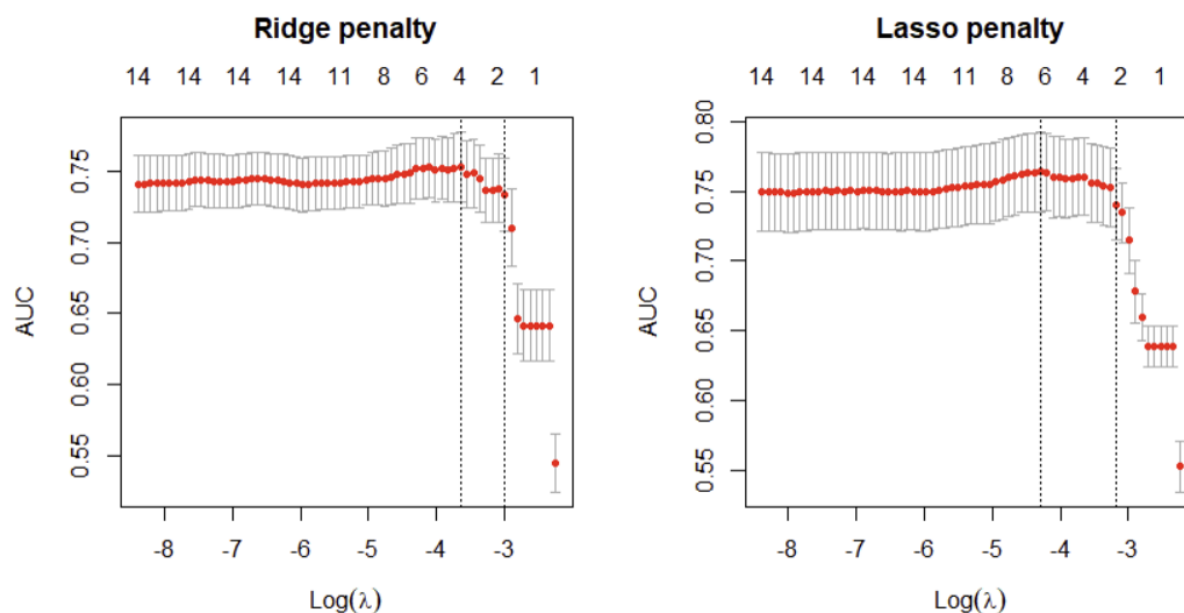

286  
 287 *Figure 1: Ridge and LASSO models showing AUC values with the corresponding  $\lambda$  values that*  
 288 *gives the best AUC values.*  
 289

## 290 Comparing the performance of the algorithms

291 All the regularization models achieved statistically improvements in AUC compared to  
292 the standard logistic regression model. The AUC of ridge regression with minimum  $\lambda$   
293  $=0.02616$  was 0.753% and for LASSO with minimum  $\lambda=0.01264$  was 0.764%. Logistic  
294 regression and elastic net regression had accuracy of 0.868% and 0.874% respectively.  
295 Elastic net model performed well in predicting TB disease out of the other models trained.

| Models      | Accuracy | AUC   |
|-------------|----------|-------|
| LR          | 0.868    | 0.744 |
| Ridge       | 0.868    | 0.753 |
| LASSO       | 0.869    | 0.764 |
| Elastic net | 0.874    | 0.762 |

296  
297 The variable importance graph for the best model is shown in figure **XX**. Night sweets in  
298 the last four weeks and use of alcohol were not important predictors and were excluded  
299 in the model. The most important predictor in the model was WHO disease stage III/IV,  
300 followed by cough in the last four weeks. Participants age and use of illegal drugs were  
301 least important predictors in the predictive model.

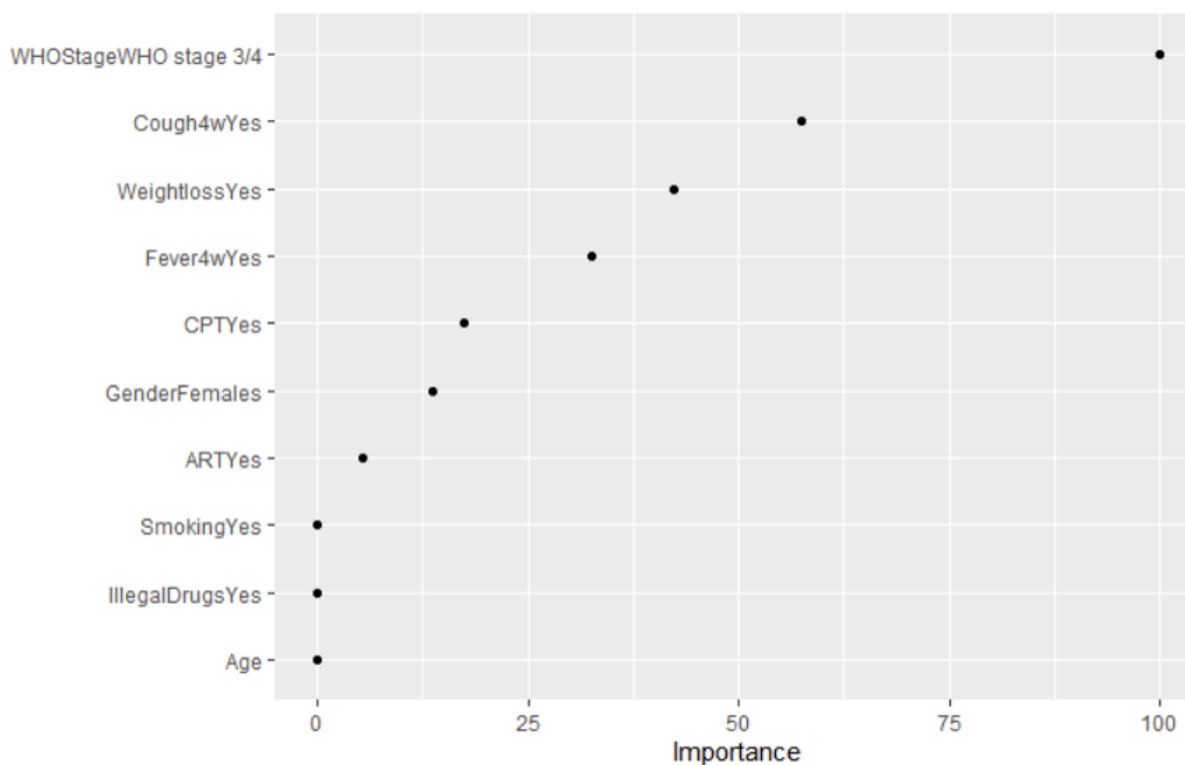

302

303 *Figure 2: Variable arranged by order of importance in predicting TB disease in PLWH*

### 304 **Discussion**

305 TB remains to be a major opportunistic infection and contributes to high mortality among  
306 PLWH. The diagnosis of TB in PLWH is a major public health problem. The WHO  
307 symptom screening algorithm for the detection of pulmonary TB among PLWH needed  
308 laboratory confirmation particularly in settings with limited resources to implement the  
309 guidelines. The current algorithm recommends that PLWH are screened by assessing  
310 symptoms and by using tests, examinations or other procedures that can be applied  
311 rapidly and if found positive to be referred for laboratory tests. In this analysis, we set to  
312 find out which predictors explains the disease and to compare the predictive performance  
313 of different models.

314 In this study we found that patients in WHO stage III/IV and those with symptoms of  
315 cough were more likely to test positive with the TB disease. Use of cough symptom as a  
316 predictor of TB had shown high sensitivity among PLWH in Ethiopia compared to the



317 other TB symptoms (18). Coughing was also associated with high odds of being infected  
318 with TB in a large national survey in Kenya(19).However, this was not the case in the  
319 general population as found in a study in south Africa(20). Our findings on the advanced  
320 WHO staging were similar to the findings among newly diagnosed HIV individuals in  
321 western Kenya that found three-fold likelihood of TB disease among this population of  
322 newly HIV diagnosed individuals(21).

323 We compared the performance of logistic regression with regularized machine learning  
324 methods for predicting the occurrence of TB in PLWH. Our results show that the  
325 regularized machine learning methods outperformed the logistic regression model in  
326 terms of both accuracy and area under the receiver operating characteristic curve (AUC-  
327 ROC). The best performing method was the elastic net regression, which achieved an  
328 AUC of 0.76, compared to 0.74 for the logistic regression model.

329 Our findings suggest that regularized machine learning methods may be more effective  
330 for predicting TB in HIV patients than traditional logistic regression models. This is likely  
331 due to the ability of regularized machine learning methods to handle high-dimensional  
332 data and avoid overfitting, which can be a significant problem in logistic regression  
333 models. Regularized machine learning methods are also more flexible in terms of the  
334 types of data they can handle and can incorporate complex relationships between  
335 variables.

336 Our study has several limitations, including the cross-sectional design and the limited  
337 sample size. We also did not include external validation of our models, which could limit  
338 the generalizability of our findings to other populations. Future studies should consider  
339 longitudinal designs and larger sample sizes to further explore the performance of these  
340 models in predicting TB in HIV patients.

341 In conclusion, our study provides evidence that regularized machine learning methods,  
342 particularly the elastic net regression model, may be more effective than logistic  
343 regression in predicting the occurrence of TB in HIV patients. These findings have  
344 important implications for clinical decision-making and the development of more  
345 accurate and effective diagnostic tools for TB in PLWH especially among individuals with  
346 advanced WHO disease stage and coughing.

### 347 **Acknowledgement**

348 We would like to thank the study participants, the study team, and collaborating partners  
349 from the ministry of health, and the health facilities in-charges of the participating health  
350 facilities

351

### 352 **Reference**

- 353 1. Bagcchi S. WHO's global tuberculosis report 2022. *The Lancet Microbe*. 2023;4(1):e20.
- 354 2. Adhikari N, Bhattarai RB, Basnet R, Joshi LR, Tinkari BS, Thapa A, et al. Prevalence and  
355 associated risk factors for tuberculosis among people living with HIV in Nepal. *PLoS One*.  
356 2022;17(1):e0262720.
- 357 3. World Health Organization. Global tuberculosis report 2021: supplementary material.  
358 2022.
- 359 4. National AIDS and STI Control Programme (NASCOP). Kenya Aids Indicator Survey  
360 2012: Final report. 2012 June 2014.
- 361 5. National Aids S. T. I. Control Programme. Kenya Population-based HIV Impact  
362 Assessment (KENPHIA) 2018. NASCOP Nairobi, Kenya; 2022.
- 363 6. National AIDS and STI Control Programme (NASCOP). Kenya Population-based HIV  
364 Impact Assessment (KENPHIA) 2018: Final Report. Nairobi.
- 365 7. Longo JD, Woromogo SH, Diemer HS, Tekpa G, Belec L, Gresenguet G. Incidence and  
366 risk factors for tuberculosis among people living with HIV in Bangui: A cohort study. *Public  
367 Health Pract (Oxf)*. 2022;4:100302.
- 368 8. Getahun H, Kittikraisak W, Heilig CM, Corbett EL, Ayles H, Cain KP, et al.  
369 Development of a standardized screening rule for tuberculosis in people living with HIV in  
370 resource-constrained settings: individual participant data meta-analysis of observational  
371 studies. *PLoS Med*. 2011;8(1):e1000391.

- 372 9. Tan HY, Yong YK, Lim SH, Ponnampalavanar S, Omar SF, Pang YK, et al. Tuberculosis  
373 (TB)-associated immune reconstitution inflammatory syndrome in TB-HIV co-infected patients  
374 in Malaysia: prevalence, risk factors, and treatment outcomes. *Sex Health*. 2014;11(6):532-9.  
375 10. Tegegne AS, Minwagaw MT. Risk Factors for the Development of Tuberculosis Among  
376 HIV-Positive Adults Under Highly Active Antiretroviral Therapy at Government Hospitals in  
377 Amhara Region, Ethiopia. *Int J Gen Med*. 2022;15:3031-41.  
378 11. Said K, Verver S, Kalingonji A, Lwilla F, Mkopi A, Charalambous S, et al. Tuberculosis  
379 among HIV-infected population: incidence and risk factors in rural Tanzania. *Afr Health Sci*.  
380 2017;17(1):208-15.  
381 12. Morasert T, Worapas W, Kaewmahit R, Uphala W. Prevalence and risk factors  
382 associated with tuberculosis disease in Suratthani Central Prison, Thailand. *Int J Tuberc Lung*  
383 *Dis*. 2018;22(10):1203-9.  
384 13. Yap P, Tan KHX, Lim WY, Barkham T, Tan LWL, Chen MI, et al. Prevalence of and risk  
385 factors associated with latent tuberculosis in Singapore: A cross-sectional survey. *Int J Infect*  
386 *Dis*. 2018;72:55-62.  
387 14. Ministry of Health, National AIDS and STI Control Programme (NASCOP). Kenya AIDS  
388 Response Progress Report 2021. Nairobi, Kenya: Ministry of Health; 2021.  
389 15. Ministry of Health, National Tuberculosis Leprosy and Lung Disease Program (NTLD-  
390 Program). Kenya tuberculosis prevalence survey 2016: Challenges and opportunities for  
391 tuberculosis control in Kenya. Nairobi, Kenya: Ministry of Health; 2016.  
392 16. Ministry of Health Ministry of Health Division of Leprosy Tuberculosis and Lung  
393 Disease. Guidelines for management of tuberculosis and leprosy in Kenya. Nairobi, Kenya 2013.  
394 17. Finch H. Applied regularization methods for the social sciences: CRC Press; 2022.  
395 18. Menberu MA. Performance of the WHO 2011 TB Symptom Screening Algorithm for  
396 Pulmonary TB Diagnosis among HIV-Infected Patients in Gondar University Referral Hospital,  
397 Ethiopia. *Int J Microbiol*. 2016;2016:9058109.  
398 19. Enos M, Sitienei J, Ong'ang'o J, Mungai B, Kamene M, Wambugu J, et al. Kenya  
399 tuberculosis prevalence survey 2016: Challenges and opportunities of ending TB in Kenya. *PLoS*  
400 *One*. 2018;13(12):e0209098.  
401 20. Maja TF, Maposa D. An Investigation of Risk Factors Associated with Tuberculosis  
402 Transmission in South Africa Using Logistic Regression Model. *Infect Dis Rep*. 2022;14(4):609-  
403 20.  
404 21. Burmen B, Modi S, Cavanaugh JS, Muttai H, McCarthy KD, Alexander H, et al.  
405 Tuberculosis screening outcomes for newly diagnosed persons living with HIV, Nyanza  
406 Province, Kenya, 2009. *Int J Tuberc Lung Dis*. 2016;20(1):79-84.
